# Supplementary material
Source: Springer Nature journal article supplement (https://www.springermedizin.de/resource/supplementary/12890_2008_148_MOESM2_ESM.pdf/9506092)

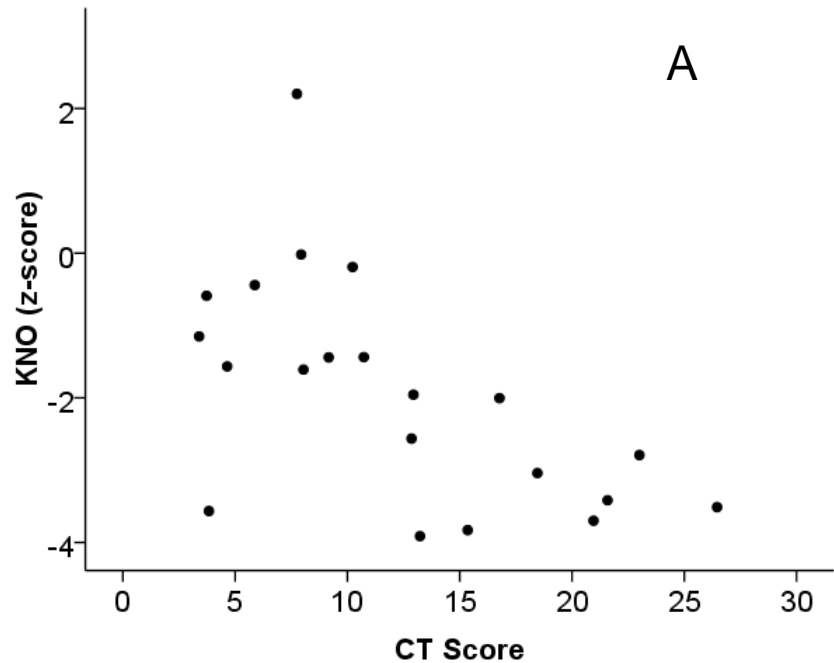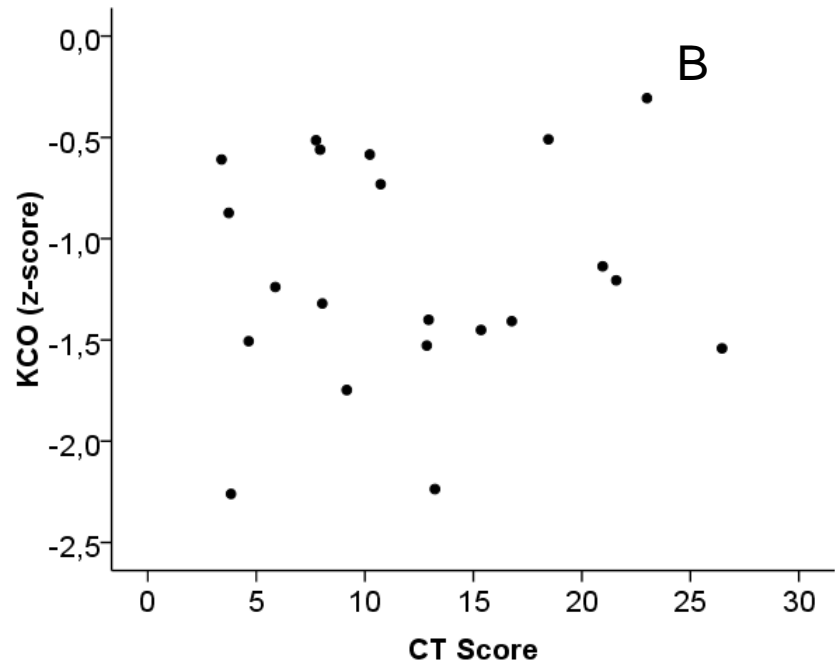

Supplement: MOESM2 [file 9506092]
